# Supplementary material
Source: PubMed Central journal article supplement (PMC5467954)
Supplement: supp_WNL.0000000000004006_Table_e-1.pdf [file supp_WNL.0000000000004006_Table_e-1.pdf]

**Table e-1. Multivariable adjusted\* odds ratios (95% CI) between  $\beta_2$ -microglobulin<sup>†</sup> and ischemic stroke stratified by eGFR, hypertension, BMI, or smoking status.**

| Stratification Factor               | Normal B2M <sup>‡</sup> | High B2M <sup>‡</sup> | OR (95% CI)          | P <sub>interaction</sub> value |
|-------------------------------------|-------------------------|-----------------------|----------------------|--------------------------------|
|                                     | Cases/Controls          | Cases/Controls        |                      |                                |
| <b>eGFR</b>                         |                         |                       |                      | NA                             |
| $\geq 60$ mL/min/1.73m <sup>2</sup> | 307/353                 | 141/106               | 1.49<br>(1.08, 2.06) |                                |
| <b>Age</b>                          |                         |                       |                      | 0.67                           |
| <65 years of age                    | 216/243                 | 98/72                 | 1.38<br>(0.92, 2.06) |                                |
| $\geq 65$ years of age              | 94/110                  | 65/48                 | 1.68<br>(1.02, 2.76) |                                |
| <b>BMI</b>                          |                         |                       |                      | 0.43                           |
| 18.0-24.9 kg/m <sup>2</sup>         | 158/201                 | 64/47                 | 1.77<br>(1.11, 2.83) |                                |
| $\geq 25$ kg/m <sup>2</sup>         | 146/143                 | 97/72                 | 1.37<br>(0.89, 2.10) |                                |

---

**History of hypertension** 0.51

No 180/244 65/66 1.30  
(0.85, 1.98)

Yes 130/109 98/54 1.71  
(1.07, 2.74)

---

**History of diabetes** 0.88

No 273/334 138/109 1.47  
(1.06, 2.03)

Yes 37/19 25/11 3.42  
(0.89, 13.13)

---

**Postmenopausal** 0.51

**Hormone Therapy Use**

No 123/149 99/75 1.48  
(0.97, 2.26)

Yes 187/204 64/45 1.48  
(0.93, 2.36)

---

---

|                |         |        |      |              |
|----------------|---------|--------|------|--------------|
| <b>Smoking</b> |         |        |      | 0.02         |
| Past/Never     | 251/301 | 137/94 | 1.73 | (1.23, 2.44) |
| Current        | 59/52   | 26/26  | 0.67 | (0.31, 1.47) |

---

\*Adjusted for matching factors (age, race/ethnicity, menopausal status, hormone use, smoking, and date of sample collection), physical activity, body mass index, aspirin use, alcohol consumption, history of diabetes, history of high blood pressure, history of coronary heart disease or revascularization and log transformed cholesterol ratio. Note: The model among those with a history of hypertension and the model among those who were past or never smokers could not be adjusted for race due to sparse data.

†Highest quartile vs quartiles 1-3

‡Normal B2M levels were defined by being in quartiles 1-3 while high B2M is defined as being in quartile 4.
